## Safety and prognostic value of vasodilator stress CMR in patients with heart failure and reduced ejection fraction

T. Pezel<sup>1</sup>, F. Sanguinetti<sup>1</sup>, M. Kinnel<sup>1</sup>, V. Landon<sup>1</sup>, P. Garot<sup>1</sup>, T. Hovasse<sup>1</sup>, T. Untersee<sup>2</sup>, S. Champagne<sup>1</sup>, Y. Louvard<sup>1</sup>, M.C. Morice<sup>1</sup>, J. Garot<sup>1</sup>

<sup>1</sup>Institut Cardiovasculaire Paris Sud, Paris, France; <sup>2</sup>Cardiovascular Institute Paris-Sud (ICPS), Department of Cardiovascular Imaging, Massy, France

**Funding Acknowledgement:** Type of funding source: None

**Background:** Recent data suggest that patients with HFrEF (heart failure with reduced left ventricular ejection fraction (LVEF) <40%) referred for stress cardiovascular magnetic resonance (CMR) may have a less optimal haemodynamic response to intravenous vasodilator. The prognostic value of stress CMR has been poorly investigated in this population.

**Purpose:** To assess the safety and the prognostic value of vasodilator stress perfusion CMR in patients with HFrEF.

**Material:** Between 2008 and 2018, we prospectively included consecutive patients with HFrEF referred for vasodilator stress perfusion CMR with dipyridamole. HFrEF was defined by a previous history of HF and known LVEF <40%. All patients with LVEF ≥40% measured by CMR were excluded.

They were followed for the occurrence of major adverse cardiovascular events (MACE) defined by cardiovascular death or nonfatal myocardial infarction (MI). The secondary endpoint was a composite outcome of cardiovascular death or rehospitalization for acute HF defined by the use of intravenous diuretics. The safety of the stress perfusion CMR was assessed by clinical monitoring for 1 hour after the end of the CMR.

Univariable and multivariable Cox regressions were performed to determine the prognostic association of inducible ischemia or late gadolinium enhancement (LGE) by CMR.

**Results:** Of 1084 patients with HFrEF (65±11 years, median LVEF

34.6±4.9%), 1049 (97%) completed the CMR protocol and among those 952 (91%) completed the follow-up (median 5.6±2.4 years). Reasons for failure to complete CMR included declining participation (n=11), renal failure (n=9), intolerance to stress agent (n=8), claustrophobia (n=4) and poor gating (n=3).

Stress CMR was well tolerated without occurrence of death or severe disabling adverse event. Among patients who underwent CMR, 600 (57%) were diagnosed with MI defined by LGE. Patients without inducible ischemia or LGE experienced a substantially lower annual event rate of MACE (1.8%) than those with ischemia and without LGE (9.4%), or those with both ischemia and LGE (12.0%;  $p<0.001$  for all). Using Kaplan-Meier analysis, the presence of inducible ischemia and LGE were significantly associated with the occurrence of MACE (hazard ratio [HR], 2.46 [95% CI, 1.69–3.59];  $p<0.001$ ) (Figure). In multivariable stepwise Cox regression including clinical characteristics and CMR, the inducible ischemia was an independent predictor of a higher incidence of MACE at follow-up (adjusted HR, 2.26 [95% CI, 1.52–3.35];  $p<0.001$ ). However, there was no significant difference between patients with or without ischemia for the secondary outcome ( $p=0.28$ ).

**Conclusions:** Stress CMR is safe and has a good discriminative prognostic value to predict the occurrence of MACE in patients with HFrEF.

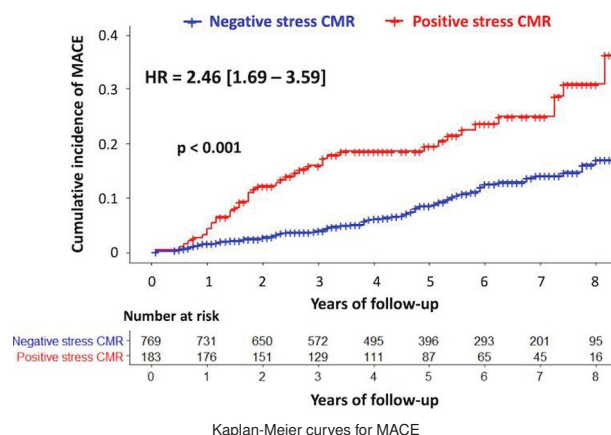

Source: http://academic.oup.com/eurheartj/article-pdf/41/Supplement_2/ehaa946.0252/34519474/ehaa946.0252.pdf
